# Supplementary material for: Reference Genes for Expression Analysis Using RT-qPCR in Cnaphalocrocis medinalis (Lepidoptera: Pyralidae)
Source: MDPI journal article supplement (doi:10.3390/insects13111046), 2022-11-13
Supplement: s1 [file s1]

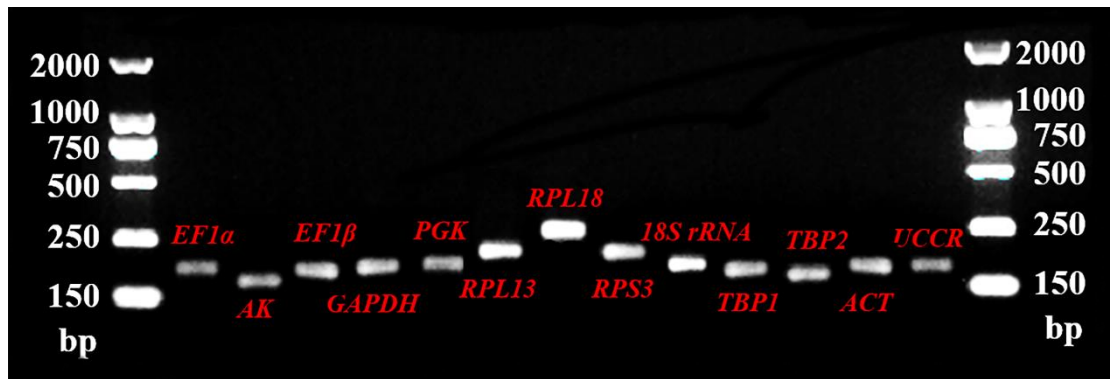

Supplementary Figure S1. Amplification specificity of primers in PCR.

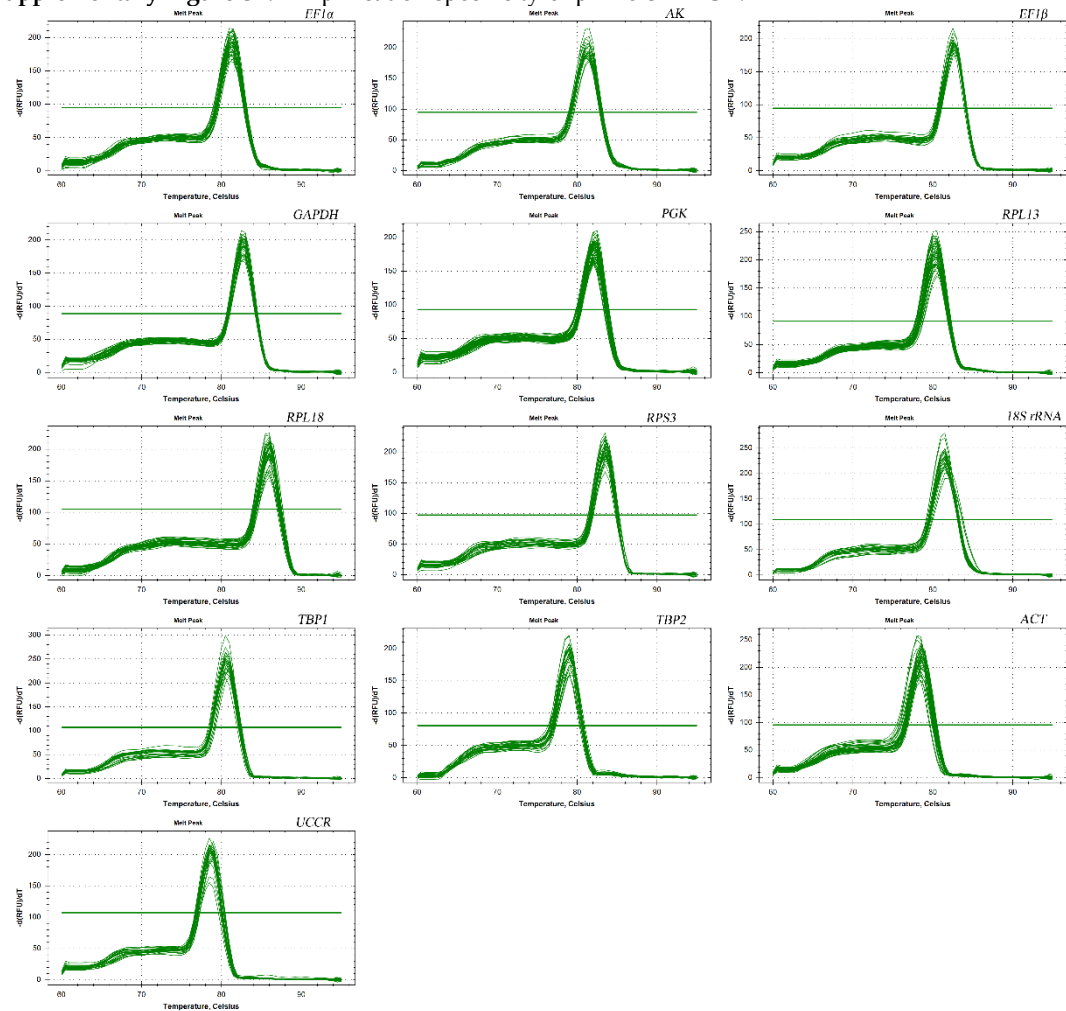

Supplementary Figure S2. Melting curves from RT-qPCR of the thirteen candidate genes.
